# Supplementary material for: Residential proximity to major roads, exposure to fine particulate matter and aortic calcium: the Framingham Heart Study, a cohort study
Source: PubMed Central journal article supplement — BMJ Open. 2017 Mar 16;7(3):e013455. doi: 10.1136/bmjopen-2016-013455 (PMC5372069; doi:10.1136/bmjopen-2016-013455), 2017-03-16
Supplement: bmjopen-2016-013455supp_tables.pdf [file bmjopen-2016-013455supp_tables.pdf]

**Supplemental Table 1: Patient Characteristics Stratified by Distance to Major Roadway Categories**

| Characteristics                                | Residential Distance to a Major Roadway |   |         |                        |   |         |                         |   |        |                          |   |        |
|------------------------------------------------|-----------------------------------------|---|---------|------------------------|---|---------|-------------------------|---|--------|--------------------------|---|--------|
|                                                | <50 m<br>(n=1,104)                      |   |         | 50-<200 m<br>(n=1,265) |   |         | 200-<400 m<br>(n=1,114) |   |        | 400-<1000 m<br>(n=1,273) |   |        |
| Age at CT Scan (years)                         | 56.8                                    | ± | 13.1    | 54.9                   | ± | 12.4    | 56.1                    | ± | 12.0   | 56.2                     | ± | 12.5   |
| Male Sex, %                                    | 547                                     |   | (50)    | 636                    |   | (50)    | 566                     |   | (51)   | 638                      |   | (50)   |
| Offspring, %                                   | 528                                     |   | (48)    | 514                    |   | (41)    | 518                     |   | (47)   | 574                      |   | (45)   |
| First CT round, %                              | 597                                     |   | (54)    | 720                    |   | (57)    | 599                     |   | (54)   | 700                      |   | (55)   |
| Education (Years)                              |                                         |   |         |                        |   |         |                         |   |        |                          |   |        |
| Some College                                   | 378                                     |   | (34)    | 411                    |   | (32)    | 343                     |   | (31)   | 400                      |   | (31)   |
| College Graduate                               | 439                                     |   | (40)    | 547                    |   | (43)    | 492                     |   | (44)   | 613                      |   | (48)   |
| Median Census Value Owner Occupied Housing, \$ | 223,667                                 | ± | 124,356 | 216,666                | ± | 100,172 | 220,212                 | ± | 90,339 | 228,709                  | ± | 91,691 |
| Current Smokers, %                             | 118                                     |   | (11)    | 162                    |   | (13)    | 104                     |   | (9)    | 115                      |   | (9)    |
| Former Smokers, %                              | 446                                     |   | (40)    | 519                    |   | (41)    | 445                     |   | (40)   | 502                      |   | (39)   |
| Pack-years                                     |                                         |   |         |                        |   |         |                         |   |        |                          |   |        |
| Current Smokers                                | 34.4                                    | ± | 16.8    | 30.2                   | ± | 12.9    | 30.8                    | ± | 14.4   | 30.8                     | ± | 15.4   |
| Former Smokers                                 | 17.2                                    | ± | 16.8    | 17.7                   | ± | 18.3    | 17.6                    | ± | 16.8   | 18.9                     | ± | 18.3   |
| Alcohol (average drinks per week)              | 4.7                                     | ± | 7.6     | 4.5                    | ± | 6.8     | 4.7                     | ± | 6.8    | 5.0                      | ± | 7.9    |
| Physical Activity Index                        | 37.1                                    | ± | 7.3     | 36.8                   | ± | 6.6     | 36.6                    | ± | 6.7    | 37.0                     | ± | 7.2    |
| Menstrual periods stopped*, %                  | 363                                     |   | (65)    | 378                    |   | (60)    | 384                     |   | (70)   | 405                      |   | (64)   |
| Diabetes History, %                            | 88                                      |   | (8)     | 85                     |   | (7)     | 88                      |   | (8)    | 93                       |   | (7)    |
| Clinically apparent CVD at CT scan, %          | 99                                      |   | (9)     | 88                     |   | (7)     | 89                      |   | (8)    | 113                      |   | (9)    |
| Body Mass Index (kg/m <sup>2</sup> )           | 28.4                                    | ± | 5.3     | 28.2                   | ± | 5.5     | 28.2                    | ± | 5.2    | 27.8                     | ± | 5.1    |
| Hypertension medications, %                    | 337                                     |   | (31)    | 334                    |   | (26)    | 323                     |   | (29)   | 360                      |   | (28)   |
| Systolic Blood Pressure (mm Hg)                | 123                                     | ± | 16      | 122                    | ± | 16      | 123                     | ± | 17     | 122                      | ± | 16     |
| Diastolic Blood Pressure (mm Hg)               | 75                                      | ± | 10      | 75                     | ± | 10      | 75                      | ± | 9      | 75                       | ± | 9      |

|                                                     |       |           |       |           |       |          |       |           |
|-----------------------------------------------------|-------|-----------|-------|-----------|-------|----------|-------|-----------|
| <b>Lipid medications, %</b>                         | 287   | (26)      | 327   | (26)      | 291   | (26)     | 347   | (27)      |
| <b>Triglycerides (mg/dL)</b>                        | 128   | ± 96      | 125   | ± 85      | 123   | ± 85     | 124   | ± 87      |
| <b>Total cholesterol/HDL</b>                        | 3.8   | ± 1.3     | 3.8   | ± 1.3     | 3.8   | ± 1.2    | 3.7   | ± 1.3     |
| <b>10-year predicted risk of CVD<sup>†</sup>, %</b> | 0.07  | ± 0.09    | 0.06  | ± 0.08    | 0.06  | ± 0.07   | 0.06  | ± 0.09    |
| <b>MDCT Scan Results</b>                            |       |           |       |           |       |          |       |           |
| <b>TAC&gt;0, %</b>                                  | 162   | (27)      | 156   | (22)      | 147   | (25)     | 182   | (26)      |
| <b>TAC, among those with TAC&gt;0<sup>‡</sup></b>   | 182.3 | (1,007.6) | 176.9 | (910.4)   | 112.5 | (441.2)  | 163.7 | (599.5)   |
| <b>AAC&gt;0, %</b>                                  | 690   | (63)      | 721   | (57)      | 704   | (63)     | 787   | (62)      |
| <b>AAC, among those with AAC&gt;0<sup>‡</sup></b>   | 728.0 | (3,213.9) | 561.9 | (2,470.9) | 567.6 | (2098.2) | 658.9 | (2,676.5) |

\* Among women.

<sup>†</sup>American College of Cardiology/American Heart Association 2013 10-year predicted risk of atherosclerotic CVD; Median, interquartile range.<sup>56</sup>

<sup>‡</sup>Median, interquartile range.

Data calculated from 4,756 observations, from 3,122 participants with a TAC measurement or at least one AAC measurement.

Number of missing observations: TAC: 40; AAC: 13; alcohol: 3; physical activity index: 43; diastolic blood pressure: 3; triglycerides: 10; total cholesterol/HDL: 15; 10-year predicted CVD risk: 1,099.

**Supplemental Table 2: Associations of Distance to Major Roadway and PM<sub>2.5</sub> with TAC and AAC: Subgroups\***

| <b>TAC</b>                                         |                             |                  |                                                                                 |                |                                                            |                             |                           |                                                                                 |  |
|----------------------------------------------------|-----------------------------|------------------|---------------------------------------------------------------------------------|----------------|------------------------------------------------------------|-----------------------------|---------------------------|---------------------------------------------------------------------------------|--|
| <b>Log of Distance to a Major Road<sup>†</sup></b> |                             |                  |                                                                                 |                | <b>2003 PM<sub>2.5</sub>(µg/m<sup>3</sup>)<sup>‡</sup></b> |                             |                           |                                                                                 |  |
|                                                    | <b>TAC&gt;0<sup>§</sup></b> |                  | <b>Linear Regression (among those with TAC&gt;0)<sup>  </sup></b>               |                |                                                            | <b>TAC&gt;0<sup>§</sup></b> |                           | <b>Linear Regression (among those with TAC&gt;0)<sup>  </sup></b>               |  |
|                                                    | <b>Odds Ratio</b>           | <b>95% CI</b>    | <b>Percent Difference</b>                                                       | <b>95% CI</b>  | <b>Odds Ratio</b>                                          | <b>95% CI</b>               | <b>Percent Difference</b> | <b>95% CI</b>                                                                   |  |
| ≤65 years                                          | 1.11                        | (0.92, 1.35)     | -3.9                                                                            | (-29.2, 26.0)  | 0.91                                                       | (0.79, 1.06)                | 2.9                       | (-19.3, 30.6)                                                                   |  |
| >65 years                                          | 0.94                        | (0.69, 1.30)     | -1.0                                                                            | (-21.2, 24.0)  | 0.85                                                       | (0.65, 1.11)                | 2.0                       | (-19.0, 27.4)                                                                   |  |
| Men                                                | 1.29                        | (1.01, 1.66)     | 9.3                                                                             | (-18.2, 43.2)  | 0.89                                                       | (0.74, 1.08)                | 16.0                      | (-10.7, 50.2)                                                                   |  |
| Women                                              | 0.91                        | (0.73, 1.13)     | -10.2                                                                           | (-30.4, 12.3)  | 0.90                                                       | (0.75, 1.08)                | -8.1                      | (-24.2, 12.8)                                                                   |  |
| Offspring                                          | 1.00                        | (0.82, 1.21)     | -6.3                                                                            | (-22.9, 12.2)  | 0.89                                                       | (0.76, 1.05)                | 5.8                       | (-11.6, 25.7)                                                                   |  |
| Third Generation                                   | 1.22                        | (0.90, 1.65)     | 28.0                                                                            | (-21.0, 147.7) | 0.90                                                       | (0.72, 1.11)                | -15.7                     | (-47.2, 34.9)                                                                   |  |
| <b>AAC</b>                                         |                             |                  |                                                                                 |                |                                                            |                             |                           |                                                                                 |  |
| <b>Log of Distance to a Major Road<sup>†</sup></b> |                             |                  |                                                                                 |                | <b>2003 PM<sub>2.5</sub>(µg/m<sup>3</sup>)<sup>‡</sup></b> |                             |                           |                                                                                 |  |
|                                                    | <b>AAC&gt;0<sup>§</sup></b> |                  | <b>Linear Mixed Effects Regression (among those with AAC&gt;0)<sup>  </sup></b> |                |                                                            | <b>AAC&gt;0<sup>§</sup></b> |                           | <b>Linear Mixed Effects Regression (among those with AAC&gt;0)<sup>  </sup></b> |  |
|                                                    | <b>Odds Ratio</b>           | <b>95% CI</b>    | <b>Percent Difference</b>                                                       | <b>95% CI</b>  | <b>Odds Ratio</b>                                          | <b>95% CI</b>               | <b>Percent Difference</b> | <b>95% CI</b>                                                                   |  |
| ≤65 years                                          |                             | NA <sup>††</sup> | 0.1                                                                             | (-10.5, 8.8)   |                                                            | NA <sup>††</sup>            | 3.2                       | (-2.5, 13.7)                                                                    |  |
| >65 years                                          |                             |                  | -1.3                                                                            | (-8.7, 11.0)   |                                                            |                             | -0.2                      | (-9.4, 9.3)                                                                     |  |
| Men                                                | 1.13                        | (0.95, 1.35)     | 3.8                                                                             | (-7.9, 14.7)   | 0.99                                                       | (0.88, 1.13)                | 6.2                       | (-1.0, 16.6)                                                                    |  |
| Women                                              | 1.05                        | (0.89, 1.25)     | -4.9                                                                            | (-14.6, 7.1)   | 0.98                                                       | (0.86, 1.13)                | -2.3                      | (-10.2, 7.8)                                                                    |  |
| Offspring                                          | 1.16                        | (0.93, 1.45)     | 1.7                                                                             | (-6.6, 11.9)   | 0.96                                                       | (0.79, 1.16)                | 6.4                       | (-1.4, 16.2)                                                                    |  |
| Third Generation                                   | 1.06                        | (0.92, 1.23)     | -3.8                                                                            | (-18.6, 8.7)   | 1.00                                                       | (0.90, 1.11)                | -2.0                      | (-9.1, 8.5)                                                                     |  |
| 10-year risk of atherosclerotic CVD <sup>**</sup>  |                             |                  |                                                                                 |                |                                                            |                             |                           |                                                                                 |  |
| 0.1–1.6%                                           | 0.96                        | (0.80, 1.14)     | -15.3                                                                           | (-32.2, 1.0)   | 1.04                                                       | (0.91, 1.19)                | 5.9                       | (-11.1, 24.9)                                                                   |  |
| 1.6–5.3%                                           | 1.08                        | (0.91, 1.28)     | 6.1                                                                             | (-9.9, 17.1)   | 0.88                                                       | (0.77, 1.01)                | -1.9                      | (-10.3, 14.7)                                                                   |  |
| 5.3–81.3%                                          | 1.45                        | (1.10, 1.90)     | 5.8                                                                             | (-5.1, 22.4)   | 1.03                                                       | (0.80, 1.31)                | -0.8                      | (-12.1, 11.2)                                                                   |  |

\* Adjusted for age at scan (age, age<sup>2</sup>), body mass index, sex, cohort, smoking status (current, former, never), pack-years, individual-level education (high school or less, some college, college graduate), median census-tract value of owner-occupied housing (quartiles), date of scan, number of days between scan and examination at which individual-level covariates reported. For AAC, also adjusted for CT scan (first or second round).

† Natural Log of proximity to a major road scaled to the difference between living at the 75<sup>th</sup> (417.9 m) vs the 25<sup>th</sup> (58.0 m) percentile from a major road.

‡ PM<sub>2.5</sub> scaled to the IQR for the 2003 average (1.4 µg/m<sup>3</sup>).

§ For TAC, distance to roadway includes 2,576 observations (647 TAC>0). PM<sub>2.5</sub> includes 2,900 observations (716 with TAC>0). For AAC, distance to roadway includes 4,743 observations (2,902 AAC>0). PM<sub>2.5</sub> includes 5,312 observations (3,212 AAC>0).

|| For linear regression of log<sub>e</sub>(TAC), distance to roadway includes 647 observations and PM<sub>2.5</sub> 716 observations. For linear mixed effects regression of AAC, distance to roadway includes 2,902 observations and PM<sub>2.5</sub> 3,212 observations. Percentile bootstrapped confidence intervals (n=1,000 clustered bootstrap samples).

†† Due to sparse data, we did not assess for heterogeneity by 10-year atherosclerotic CVD risk for the outcomes of detectable TAC or log<sub>e</sub>(TAC) or by age for the outcome of detectable AAC.

‡‡ For assessing for heterogeneity by 10-year risk of atherosclerotic CVD with the outcome of AAC, distance to roadway includes 3,652 observations (2,262 AAC>0) and PM<sub>2.5</sub> includes 4,098 observations (2,499 AAC>0).
